# Supplementary material
Source: Elsevier journal article supplement (https://www.sciencedirect.com/science/article/pii/S0213911119301748)
Supplement: mmc1 [file S0213911119301748:mmc1.docx]

**Appendix**

**Table I**

Educational profile of Spanish couples where both partners are aged 65-80. Spain, 2015.

|  | | **Male partner** | | | |
| --- | --- | --- | --- | --- | --- |
| **Low education** | **Medium education** | **High education** | **Total**  **N (%)** |
| *Female partner* | Low education | 325 | 131 | 21 | 477 (26.7) |
| Medium education | 121 | 720 | 218 | 1,059 (59.3) |
| High education | 4 | 57 | 190 | 251 (14.0) |
| Total, N (%) | 450 (25.2%) | 908 (50.8%) | 429 (24.0%) | 1787 |

Source: Spanish sample EU-SILC 2015.

**Table II**

Coefficients from logistic regression models of self-perceived health for partnered individuals aged 65-81 by sex. Spain, 2015.

|  |
| --- |
|  | |  | **Women** | | | | **Men** | | | |
|  | |  | **Odds ratio** | | **CI** | | **Odds ratio** |  | **CI** | |
| *Education of both partners (ref.: both partners low education)* | | |  |  |  |  |  |  |  |  |
|  | | Ego low education and partner medium or high education | 1.07 |  | 0.60 | 1.90 | 0.75 |  | 0.44 | 1.28 |
|  | | Ego medium education and partner low education | 0.91 |  | 0.51 | 1.60 | 0.88 |  | 0.51 | 1.51 |
|  | | Both partners medium education | 0.69 | a | 0.48 | 1.00 | 0.60 | b | 0.42 | 0.85 |
|  | | Ego medium education and partner high education | 0.59 | a | 0.37 | 0.93 | 1.08 |  | 0.51 | 2.28 |
|  | | Ego high education and partner low or medium education | 0.37 | b | 0.18 | 0.77 | 0.64 | c | 0.41 | 1.01 |
|  | | Both partners high education | 0.31 | d | 0.19 | 0.51 | 0.48 | b | 0.29 | 0.77 |
| *Age gap between partners (ref.: no age gap or male partner 1-2 years older)* | | |  |  |  |  |  |  |  |  |
|  | | Female partner older | 0.91 |  | 0.63 | 1.30 | 0.96 |  | 0.67 | 1.39 |
|  | | Male partner 3-5 years older | 0.95 |  | 0.69 | 1.31 | 0.97 |  | 0.72 | 1.32 |
|  | | Male partner 6+ years older | 1.43 | c | 0.95 | 2.15 | 0.99 |  | 0.68 | 1.45 |
| *Partner health status (ref.: good and very good health)* | | |  |  |  |  |  |  |  | 0.00 |
|  | | Fair, poor or very poor health | 3.75 | d | 2.91 | 4.83 | 3.75 | d | 2.91 | 4.83 |
| *Household ability to make ends meet (ref.: with difficulty)* | | |  |  |  |  |  |  |  |  |
|  | | With some difficulty | 0.84 |  | 0.58 | 1.19 | 1.06 |  | 0.75 | 1.48 |
|  | | Fairly easily | 0.75 |  | 0.52 | 1.07 | 0.68 | a | 0.49 | 0.96 |
|  | | Easily | 0.58 | a | 0.37 | 0.92 | 0.57 | a | 0.36 | 0.88 |
| *Age* | | | 1.09 | d | 1.06 | 1.12 | 1.08 | d | 1.05 | 1.10 |
| *Constant* | | | 0.00 | d | 0.00 | 0.02 | 0.00 | d | 0.00 | 0.03 |
| *Pseudo R-Square* | | | 0.18 |  |  |  | 0.15 |  |  |  |
| *N* | |  | 1787 |  |  |  | 1787 |  |  |  |

CI: confidence interval.

a p<0.05.

b p <0.001.

c p<0.01.

d p <0.001.

Controlled for age. Data weighted by the survey’s personal cross-sectional weight.

**Table III**

Coefficients from logistic regression models of self-perceived health for partnered individuals aged 65-81 by sex. Spain, 2015.

|  |  | **Model 1** | **Model 2** | **Model 3** | **Model 4** | **Model 5** | **Model 6** | **Model 7** | **Model 8** |
| --- | --- | --- | --- | --- | --- | --- | --- | --- | --- |
| *Education of both partners (ref. both partners low education)* | | | |  |  |  |  |  |  |
|  | Ego low education and partner medium or high education | 1.03 | 1.06 | 1.06 | 1.09 | 1.08 | 1.07 |  |  |
|  | Ego medium education and partner low education | 0.89 | 0.9 | 0.88 | 0.9 | 0.92 | 0.91 |  |  |
|  | Both partners medium education | 0.66a | 0.68a | 0.68a | 0.71 | 0.7 | 0.69a |  |  |
|  | Ego medium education and partner high education | 0.53b | 0.57a | 0.57a | 0.61a | 0.61a | 0.59a |  |  |
|  | Ego high education and partner low or medium education | 0.35b | 0.39a | 0.38a | 0.38a | 0.39a | 0.37b |  |  |
|  | Both partners high education | 0.27c | 0.31c | 0.30c | 0.33c | 0.34c | 0.31c |  |  |
| *Age gap between partners (ref.: no age gap or male partner 1-2 years older)* | | | | |  |  |  |  |  |
|  | Female partner older | 0.9 | 0.91 | 0.89 | 0.9 | 0.91 | 0.91 | 0.84 | 0.83 |
|  | Male partner 3-5 years older | 0.97 | 0.96 | 0.95 | 0.94 | 0.95 | 0.95 | 0.93 | 0.94 |
|  | Male partner 6+ years older | 1.45d | 1.43d | 1.41d | 1.39 | 1.41d | 1.43d | 1.35 | 1.37 |
| *Partner health status (ref.: good and very good health)* | | |  |  |  |  |  |  |  |
|  | Fair, poor or very poor health | 3.85c | 3.85c | 3.87c | 3.78c | 3.76c | 3.75c | 3.99c | 4.15c |
| *Overall income quintiles (ref.: 1st quintile)* | |  |  |  |  |  |  |  |  |
|  | 2nd quintile |  | 1.05 | 1.04 | 1.1 | 1.11 |  | 1.11 | 1.04 |
|  | 3d quintile |  | 0.95 | 0.94 | 0.99 | 0.99 |  | 0.90 | 0.84 |
|  | 4th quintile |  | 0.93 | 0.92 | 1.03 | 1.03 |  | 0.89 | 0.77 |
|  | 5th quintile |  | 0.78 | 0.76 | 0.86 | 0.88 |  | 0.61a | 0.50b |
| *Relative contribution to the overall household income (ref.: no contributive pension)* | | | | | |  |  |  |  |
|  | Less than 50% |  |  | 1.02 | 1.01 |  |  | 1.01 | 1.03 |
|  | 50% or more |  |  | 1.37 | 1.37 |  |  | 1.10 | 1.09 |
| *Household ability to make ends meet (ref.: with difficulty)* | | | |  |  |  |  |  |  |
|  | With some difficulty |  |  |  | 0.83 | 0.83 | 0.84 | 0.81 |  |
|  | Fairly easily |  |  |  | 0.75 | 0.75 | 0.75 | 0.71d |  |
|  | Easily |  |  |  | 0.59a | 0.6a | 0.58a | 0.52b |  |
| *Constant* | | 0.00c | 0.00c | 0.00c | 0.00c | 0.00c | 0.00c | 0.00c | 0.00c |
| *N* |  | 1787 | 1787 | 1787 | 1787 | 1787 | 1787 | 1787 | 1787 |
| *Pseudo R-Square* | | 0.1642 | 0.1639 | 0.1644 | 0.1673 | 0.1666 | 0.1674 | 0.1542 | 0.1495 |

a p <0.05.

b p <0.001.

c p <0.001.

d p <0.1.

Controlled for age. Data weighted by the survey’s personal cross-sectional weight.

**Table IV**

Coefficients from logistic regression models of chronic conditions and limitations for partnered women aged 65-81. Spain, 2015.

|  |  | **Suffer from any chronic condition/illness** | | | | **Limitations in activities because of health** | | | |
| --- | --- | --- | --- | --- | --- | --- | --- | --- | --- |
|  |  | **Odds ratio** | | **CI** | | **Odds ratio** |  | **CI** | |
| *Education of both partners (ref.: both partners low education)* | |  |  |  |  |  |  |  |  |
|  | Ego low education and partner medium or high educ. | 1.69 | a | 1.02 | 2.81 | 1.24 |  | 0.75 | 2.05 |
|  | Ego medium education and partner low education | 1.17 |  | 0.67 | 2.02 | 0.94 |  | 0.55 | 1.62 |
|  | Both partners medium education | 0.74 | b | 0.53 | 1.02 | 0.66 | a | 0.48 | 0.92 |
|  | Ego medium education and partner high education | 0.76 |  | 0.49 | 1.19 | 0.68 | b | 0.44 | 1.06 |
|  | Ego high education and partner low or medium education | 0.48 | a | 0.25 | 0.95 | 0.64 |  | 0.31 | 1.31 |
|  | Both partners high education | 0.56 | a | 0.35 | 0.90 | 0.36 | c | 0.22 | 0.59 |
| *Age gap between partners (ref.: no age gap or male partner 1-2 years older)* | |  |  |  |  |  |  |  |  |
|  | Female partner older | 1.03 |  | 0.72 | 1.47 | 1.04 |  | 0.73 | 1.49 |
|  | Male partner 3-5 years older | 1.09 |  | 0.81 | 1.46 | 0.91 |  | 0.67 | 1.23 |
|  | Male partner 6+ years older | 1.43 | b | 0.98 | 2.10 | 1.43 | b | 0.96 | 2.11 |
| *Partner health status (ref.: good and very good health)* | |  |  |  |  |  |  |  |  |
|  | Fair, poor or very poor health | 2.05 | c | 1.61 | 2.61 | 2.82 | c | 2.20 | 3.61 |
| *Household ability to make ends meet (ref.: with difficulty)* | |  |  |  |  |  |  |  |  |
|  | With some difficulty | 0.79 |  | 0.56 | 1.10 | 1.12 |  | 0.81 | 1.55 |
|  | Fairly easily | 0.74 | b | 0.53 | 1.03 | 0.75 | b | 0.53 | 1.04 |
|  | Easily | 0.54 | d | 0.35 | 0.83 | 0.54 | d | 0.35 | 0.85 |
| *Age* | | 1.07 | c | 1.04 | 1.09 | 1.10 | c | 1.07 | 1.13 |
| *Constant* | | 0.01 | c | 0.00 | 0.09 | 0.00 | c | 0.00 | 0.01 |
| *Pseudo R-Square* | | 0.08 | | | | 0.15 | | | |
| *N* |  | 1787 | | | | 1787 | | | |

CI: confidence interval.

a p <0.05.

b p <0.1.

c p <0.001.

d p <0.001.

Controlled for age. Data weighted by the survey’s personal cross-sectional weight.

**Table V**

Coefficients from logistic regression models of chronic conditions and limitations for partnered men aged 65-81. Spain, 2015.

|  |  | **Suffer from any chronic condition/illness** | | | | **Limitations in activities because of health** | | | |
| --- | --- | --- | --- | --- | --- | --- | --- | --- | --- |
|  |  | **Odds ratio** | | **CI** | | **Odds ratio** |  | **CI** | |
| *Education of both partners (ref.: both partners low education)* | |  |  |  |  |  |  |  |  |
|  | Ego low education and partner medium or high education | 1.08 |  | 0.63 | 1.85 | 0.75 |  | 0.45 | 1.25 |
|  | Ego medium education and partner low education | 1.26 |  | 0.74 | 2.14 | 0.86 |  | 0.51 | 1.45 |
|  | Both partners medium education | 0.81 |  | 0.57 | 1.13 | 0.61 | a | 0.44 | 0.85 |
|  | Ego medium education and partner high education | 0.90 |  | 0.45 | 1.79 | 0.49 | b | 0.23 | 1.04 |
|  | Ego high education and partner low or medium education | 0.93 |  | 0.60 | 1.44 | 0.64 | c | 0.41 | 1.00 |
|  | Both partners high education | 0.86 |  | 0.53 | 1.39 | 0.47 | a | 0.29 | 0.76 |
| *Age gap between partners (ref.: no age gap or male partner 1-2 years older)* | |  |  |  |  |  |  |  |  |
|  | Female partner older | 0.90 |  | 0.62 | 1.30 | 1.23 |  | 0.86 | 1.76 |
|  | Male partner 3-5 years older | 0.72 | c | 0.55 | 0.96 | 0.73 | c | 0.54 | 0.98 |
|  | Male partner 6+ years older | 1.16 |  | 0.79 | 1.71 | 1.17 |  | 0.81 | 1.70 |
| *Partner health status (ref.: good and very good health)* | |  |  |  |  |  |  |  |  |
|  | Fair, poor or very poor health | 2.11 | d | 1.65 | 2.71 | 2.78 | d | 2.16 | 3.58 |
| *Household ability to make ends meet (ref.: with difficulty)* | |  |  |  |  |  |  |  |  |
|  | With some difficulty | 1.32 |  | 0.94 | 1.85 | 1.15 |  | 0.83 | 1.60 |
|  | Fairly easily | 0.94 |  | 0.68 | 1.30 | 0.81 |  | 0.58 | 1.12 |
|  | Easily | 1.07 |  | 0.70 | 1.64 | 0.57 | c | 0.37 | 0.90 |
| *Age* | | 1.05 | d | 1.02 | 1.08 | 1.08 | d | 1.06 | 1.11 |
| *Constant* | | 0.03 | d | 0.00 | 0.21 | 0.00 | d | 0.00 | 0.01 |
| *Pseudo R-Square* | | 0.06 | | | | 0.13 | | | |
| *N* |  | 1787 | | | | 1787 | | | |

CI: confidence interval.

a p <0.001.

b p <0.1.

c p <0.05.

d p <0.001.

Controlled for age. Data weighted by the survey’s personal cross-sectional weight.
